# Supplementary material for: Simultaneous Determination of Sulfonamides Antibiotics in Environmental Water and Seafood Samples Using Ultrasonic-Assisted Dispersive Liquid-Liquid Microextraction Coupled with High Performance Liquid Chromatography
Source: MDPI journal article supplement (doi:10.3390/molecules27072160), 2022-03-27
Supplement: s1 [file s1]

# **Simultaneous Determination of Sulfonamides Antibiotics in Environmental Water and Seafood Samples Using Ultrasonic-Assisted Dispersive Liquid-Liquid Microextraction Coupled with High Performance Liquid Chromatography**

**Yixiao Wang<sup>1,2</sup>, Jinhua Li<sup>1,2,3,\*</sup>, Ling Ji<sup>4</sup> and Lingxin Chen<sup>1,3</sup>**

- <sup>1</sup> CAS Key Laboratory of Coastal Environmental Processes and Ecological Remediation,  
Shandong Key Laboratory of Coastal Environmental Processes,  
Research Center for Coastal Environmental Engineering and Technology of  
Shandong Province,  
Yantai Institute of Coastal Zone Research, Chinese Academy of Sciences, Yantai  
264003, China; yixiaowang@yic.ac.cn (Y.W.); lxchen@yic.ac.cn (L.C.)
- <sup>2</sup> University of Chinese Academy of Sciences, Beijing 100049, China
- <sup>3</sup> Center for Ocean Mega-Science, Chinese Academy of Sciences, Qingdao 266071,  
China
- <sup>4</sup> Yantai Oceanic Environmental Monitoring Central Station, State Oceanic  
Administration,  
Yantai 264006, China; jiling562@163.com
- \* Correspondence: jhli@yic.ac.cn

**Figure S1.** The chemical structures and related  $pK_a$  and  $\log P$  values of the seven SAs.

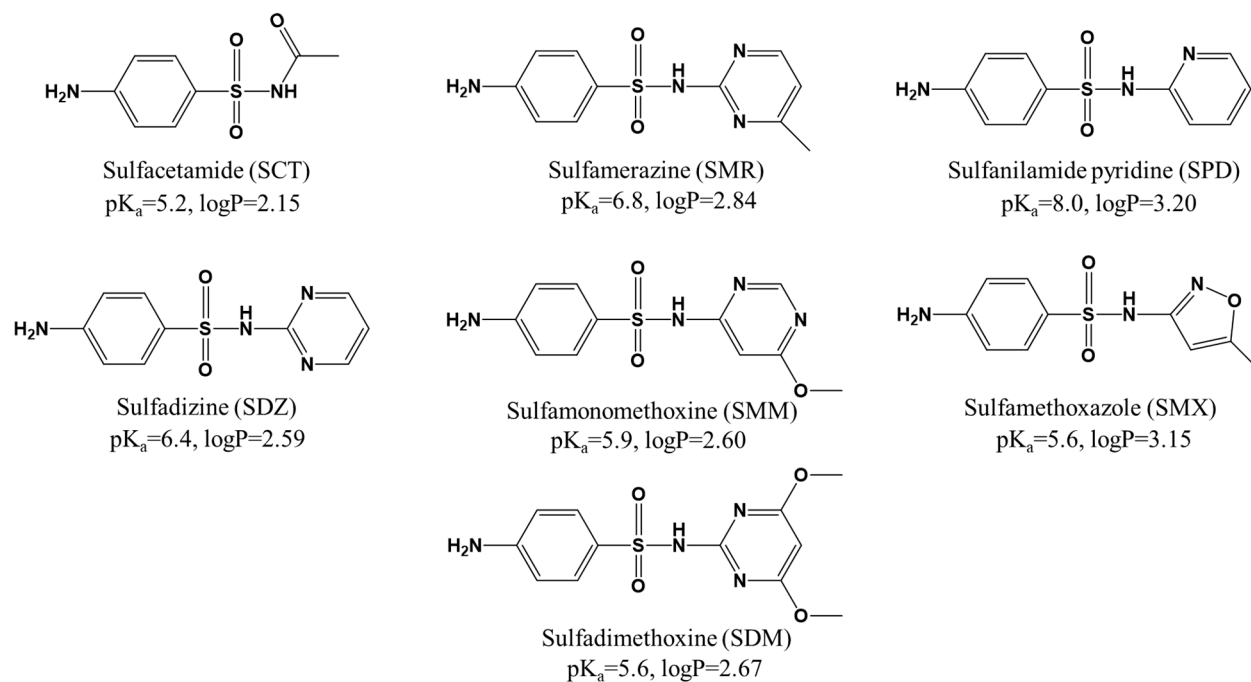

**Figure S2.** (A) Chromatograms of the seven SAs using 1 mL of MeOH (a), ACN (b) and 0.4% HAc:ACN, v:v=50:50 (c) as redissolved solvents. (B) Effect of redissolved solvents on the peak areas of the seven SAs. Error bars are from  $n=5$ . Other DLLME conditions: sample solution: 5 mL; ultrasound time: 5 min; centrifuge time: 8 min; centrifuge rate: 8000 rpm.

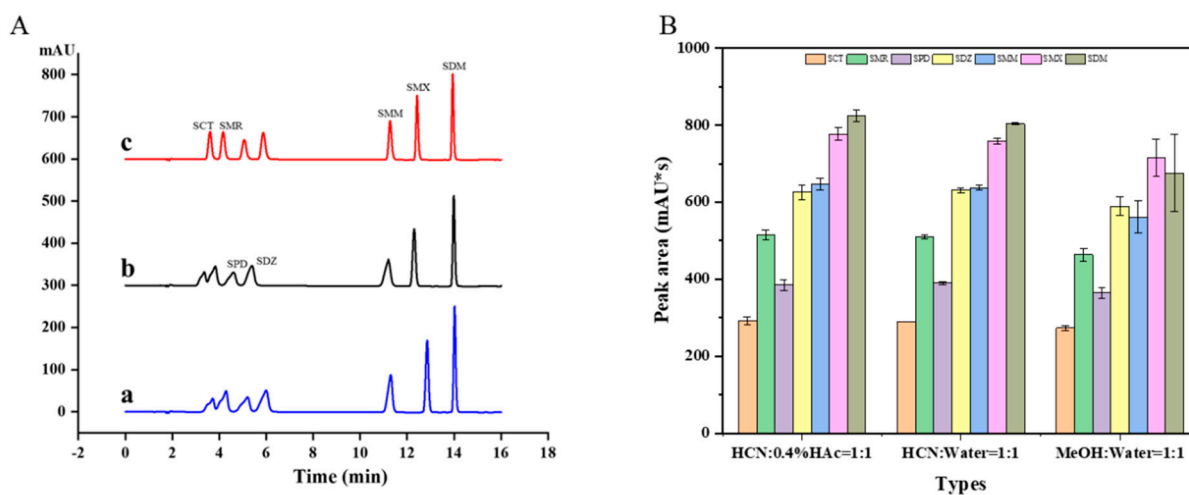

**Figure S3.** Chromatograms of the seven SAs with/without DLLME in (A) seawater samples and (B) pomfret samples. (a) blank samples with DLLME, (b) without DLLME in spiked seawater samples with seven SAs individual at 500  $\mu\text{g/L}$ , and (c) after DLLME in spiked seawater samples with seven SAs individual at 500  $\mu\text{g/L}$ .

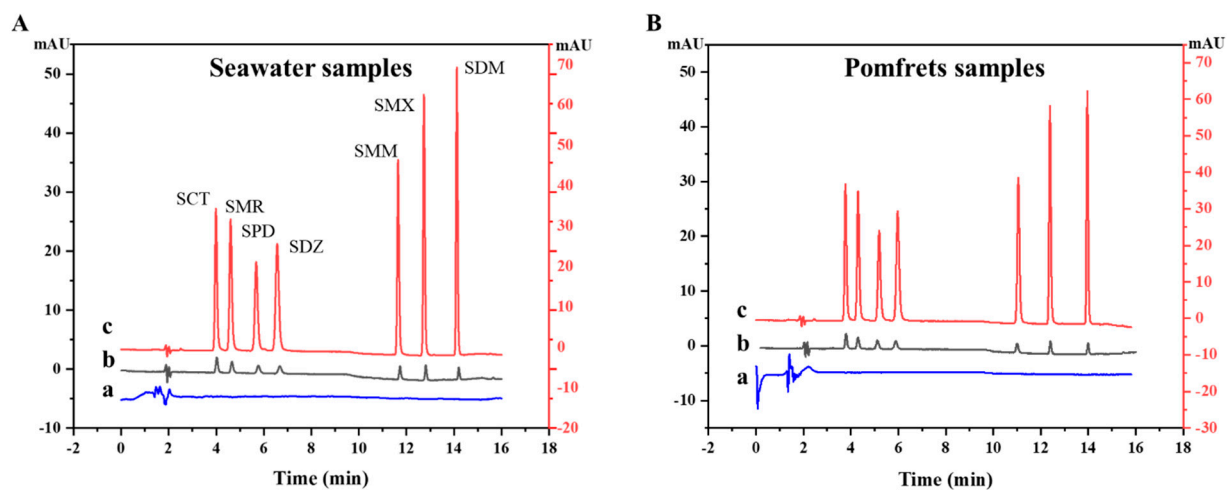

**Figure S4.** Chromatograms of (a) seawater sample near Chang Island and (b) standard solution at 100  $\mu\text{g/L}$ .

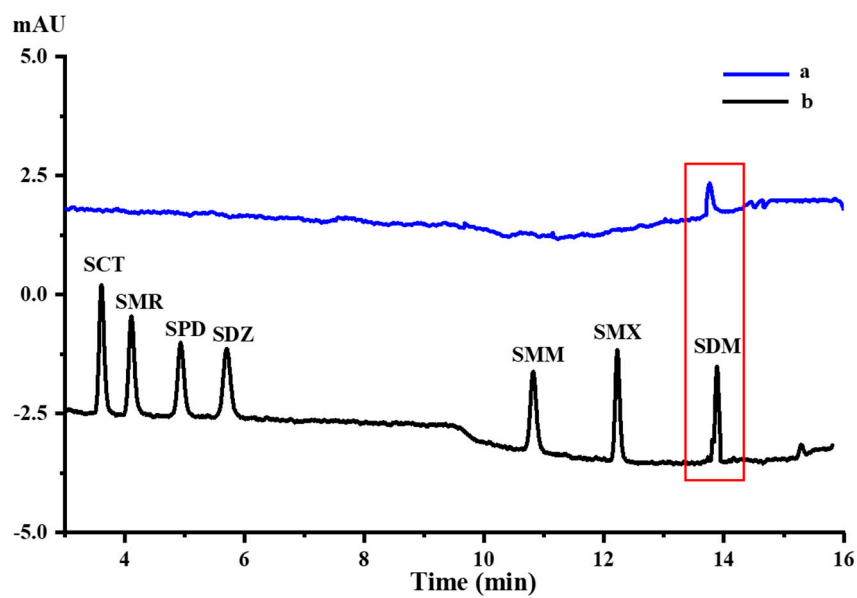

**Table S1.** Analytical performances of the UA-DLLME-HPLC-DAD method for the determination of seven SAs in water and seafood samples<sup>a</sup>.

| Sample                              | SAs | Regression equation    | <i>r</i> | Linear range <sup>b</sup> (μg/L) | LOD <sup>c</sup> (μg/L) | LOQ <sup>c</sup> (μg/L) |
|-------------------------------------|-----|------------------------|----------|----------------------------------|-------------------------|-------------------------|
| Aquaculture wastewater <sup>d</sup> | SCT | $y = 0.2668x + 1.210$  | 0.9999   | 10–5000                          | 3.5                     | 11.6                    |
|                                     | SMR | $y = 0.3300x + 1.226$  | 0.9999   | 10–5000                          | 3.3                     | 10.8                    |
|                                     | SPD | $y = 0.2600x + 2.604$  | 0.9999   | 10–5000                          | 5.4                     | 18.0                    |
|                                     | SDZ | $y = 0.3776x + 1.334$  | 0.9999   | 10–5000                          | 4.7                     | 15.5                    |
|                                     | SMM | $y = 0.3855x + 0.721$  | 0.9999   | 5–5000                           | 3.6                     | 11.9                    |
|                                     | SMX | $y = 0.4588x + 0.308$  | 0.9999   | 5–5000                           | 2.6                     | 8.6                     |
|                                     | SDM | $y = 0.5066x - 6.045$  | 0.9999   | 5–5000                           | 2.4                     | 7.8                     |
| Lake water <sup>e</sup>             | SCT | $y = 0.1831x - 0.237$  | 0.9999   | 10–5000                          | 7.0                     | 23.4                    |
|                                     | SMR | $y = 0.3066x - 3.283$  | 0.9999   | 5–5000                           | 4.6                     | 15.2                    |
|                                     | SPD | $y = 0.2521x - 2.185$  | 0.9999   | 5–5000                           | 6.6                     | 21.9                    |
|                                     | SDZ | $y = 0.3294x + 0.938$  | 0.9999   | 5–5000                           | 4.4                     | 14.6                    |
|                                     | SMM | $y = 0.3626x - 0.404$  | 0.9999   | 5–5000                           | 2.1                     | 7.1                     |
|                                     | SMX | $y = 0.4419x - 0.448$  | 0.9999   | 5–5000                           | 1.5                     | 5.0                     |
|                                     | SDM | $y = 0.5053x - 5.198$  | 0.9999   | 5–5000                           | 1.1                     | 3.6                     |
| Prawns <sup>f</sup>                 | SCT | $y = 0.3469x - 10.559$ | 0.9999   | 10–5000                          | 4.3                     | 14.2                    |
|                                     | SMR | $y = 0.3697x - 1.730$  | 0.9999   | 10–5000                          | 3.1                     | 10.5                    |
|                                     | SPD | $y = 0.3063x - 1.612$  | 0.9999   | 10–5000                          | 3.5                     | 11.5                    |
|                                     | SDZ | $y = 0.4036x - 5.900$  | 0.9999   | 10–5000                          | 3.1                     | 10.3                    |
|                                     | SMM | $y = 0.4195x - 1.135$  | 0.9999   | 5–5000                           | 2.1                     | 6.8                     |
|                                     | SMX | $y = 0.5128x - 0.709$  | 0.9999   | 5–5000                           | 1.2                     | 3.9                     |
|                                     | SDM | $y = 0.5652x + 0.686$  | 0.9999   | 5–5000                           | 0.7                     | 2.4                     |

<sup>a</sup>  $n=5$ .

<sup>b</sup> Based on peak area.

<sup>c</sup> Based on peak height.

<sup>d</sup> From a fishery farm in Laizhoiu City, Yantai City.

<sup>e</sup> From an artificial lake in Yantai University.

<sup>f</sup> From a local market in Laishan District, Yantai City.

**Table S2.** Method precision of peak retention time and peak area in the standard solution.

| SAs | RSD (% , <i>n</i> =5) |           |                |           |
|-----|-----------------------|-----------|----------------|-----------|
|     | Intraday              |           | Interday       |           |
|     | Retention time        | Peak area | Retention time | Peak area |
| SCT | 1.1                   | 0.7       | 2.7            | 1.4       |
| SMR | 0.9                   | 0.7       | 1.6            | 2.4       |
| SPD | 1.1                   | 0.5       | 2.3            | 1.7       |
| SDZ | 0.8                   | 0.6       | 1.5            | 1.2       |
| SMM | 0.5                   | 1.5       | 1.3            | 0.8       |
| SMX | 1.2                   | 0.3       | 0.9            | 1.1       |
| SDM | 0.3                   | 0.7       | 1.1            | 1.6       |

**Table S3.** Found values and recovery of the UA-DLLME-HPLC-UV method for the determination of SAs in water and seafood samples<sup>a</sup>.

| SAs | Spiked (µg/L) | Aquaculture wastewater |              |         | Lake water   |              |         | Prawns          |              |         |
|-----|---------------|------------------------|--------------|---------|--------------|--------------|---------|-----------------|--------------|---------|
|     |               | Found (µg/L)           | Recovery (%) | RSD (%) | Found (µg/L) | Recovery (%) | RSD (%) | Found (µg/L)    | Recovery (%) | RSD (%) |
| SCT | 0             | ND <sup>b</sup>        |              |         | ND           |              |         | ND <sup>a</sup> |              |         |
|     | 50            | 47                     | 94.0         | 3.9     | 47           | 94.0         | 5.6     | 57              | 114.0        | 3.8     |
|     | 500           | 509                    | 101.8        | 2.2     | 503          | 100.6        | 3.3     | 481             | 96.2         | 1.5     |
|     | 5000          | 4999                   | 100.0        | 1.0     | 5000         | 100.0        | 0.6     | 5002            | 100.0        | 0.4     |
| SMR | 0             | ND                     |              |         | ND           |              |         | ND              |              |         |
|     | 50            | 48                     | 96.0         | 1.4     | 55           | 110.0        | 5.6     | 47              | 94.0         | 6.1     |
|     | 500           | 509                    | 101.8        | 1.3     | 474          | 94.8         | 2.1     | 529             | 105.8        | 0.8     |
|     | 5000          | 4999                   | 100.0        | 0.6     | 5003         | 100.1        | 1.2     | 4998            | 100.0        | 0.8     |
| SPD | 0             | ND                     |              |         | ND           |              |         | ND              |              |         |
|     | 50            | 47                     | 94.0         | 6.6     | 57           | 114.0        | 2.9     | 49              | 98.0         | 4.5     |
|     | 500           | 496                    | 99.2         | 2.2     | 480          | 96.0         | 3.5     | 523             | 104.6        | 3.5     |
|     | 5000          | 5001                   | 100.0        | 2.0     | 5002         | 100.0        | 0.7     | 4998            | 100.0        | 0.4     |
| SDZ | 0             | ND                     |              |         | ND           |              |         | ND              |              |         |
|     | 50            | 47                     | 94.0         | 2.0     | 50           | 100.0        | 2.0     | 58              | 116.0        | 6.7     |
|     | 500           | 502                    | 100.4        | 2.0     | 502          | 100.4        | 3.7     | 489             | 97.8         | 0.7     |
|     | 5000          | 5000                   | 100.0        | 0.7     | 5000         | 100.0        | 0.8     | 5001            | 100.0        | 0.5     |
| SMM | 0             | ND                     |              |         | ND           |              |         | ND              |              |         |
|     | 50            | 48                     | 96.0         | 2.3     | 49           | 98.0         | 2.5     | 50              | 100.0        | 3.0     |
|     | 500           | 503                    | 100.6        | 0.6     | 498          | 99.6         | 2.7     | 493             | 98.6         | 1.8     |
|     | 5000          | 5000                   | 100.0        | 1.8     | 4959         | 99.2         | 0.2     | 5001            | 100.0        | 0.3     |
| SMX | 0             | ND                     |              |         | ND           |              |         | ND              |              |         |
|     | 50            | 49                     | 98.0         | 3.1     | 49           | 99.0         | 4.8     | 51              | 102.0        | 3.4     |
|     | 500           | 499                    | 99.8         | 1.2     | 497          | 99.3         | 3.8     | 493             | 98.6         | 1.4     |
|     | 5000          | 5000                   | 100.0        | 2.0     | 5000         | 100.0        | 0.4     | 5001            | 100.0        | 0.1     |
| SDM | 0             | ND                     |              |         | ND           |              |         | ND              |              |         |
|     | 50            | 58                     | 116.0        | 6.8     | 53           | 106.9        | 1.4     | 49              | 98.0         | 4.3     |
|     | 500           | 466                    | 93.0         | 6.8     | 458          | 91.7         | 1.7     | 485             | 97.0         | 1.4     |
|     | 5000          | 5003                   | 100.1        | 0.8     | 5004         | 100.1        | 1.1     | 5002            | 100.0        | 0.2     |

<sup>a</sup>  $n=5$ .<sup>b</sup> Not detected.



**Table S4.** The results of detecting seven SAs in real samples by UA-DLLME-HPLC-DAD method<sup>a</sup>.

| Samples  | Sampling location                    | Found (μg/L)    |
|----------|--------------------------------------|-----------------|
| Seawater | Near Yangma Island                   | ND <sup>b</sup> |
|          | Near Chang Island                    | 24.49 (SDM)     |
|          | Oriental Ocean Fishery <sup>c</sup>  | ND              |
|          | Muping Research Station <sup>d</sup> | ND              |
| Seafood  | Near Zhifu Island (the Yellow Sea)   | ND              |

<sup>a</sup>  $n=3$ .

<sup>b</sup> Not Detected.

<sup>c</sup> Oriental Ocean Trepang Breeding Base.

<sup>d</sup> Muping Coastal Environment Research Station, Chinese Academy of Sciences.
